# Supplementary material for: Social vulnerability and the risk of respiratory virus infection in households: a case-ascertained study
Source: Research Square preprint supplement (doi:10.21203/rs.3.rs-6658856/v1), 2025-06-30
Supplement: Supplementary file 1 [file 0f70b2c06750cf57ff4ff28d.docx]

Social vulnerability and the risk of respiratory virus infection in households: a case-ascertained study: Supplemental tables and figures

**Supplement**

Supplemental Table 1: Adjusted Incident Rate Ratios (aIRRs)1 of SARS-CoV-2 among exposed household contacts by National Social Vulnerability Index overall and by domain percentiles, adjusted for age, study site, and race/ethnicity, cluster adjusted within census tract in a case ascertained household transmission study, United States, September 2021-May 2023

|  | **Overall** | | | **Theme 1: Socioeconomic Status** | | | **Theme 2: Household Characteristics** | | | **Theme 3: Racial/ethnic minorities** | | | **Theme 4: Household type-transportation-crowding** | | |
| --- | --- | --- | --- | --- | --- | --- | --- | --- | --- | --- | --- | --- | --- | --- | --- |
| **Characteristic** | **IRR***1* | **95% CI***1* | **p-value** | **IRR***1* | **95% CI***1* | **p-value** | **IRR***1* | **95% CI***1* | **p-value** | **IRR***1* | **95% CI***1* | **p-value** | **IRR***1* | **95% CI***1* | **p-value** |
| SVI | 1.24 | 1.00, 1.52 | 0.045 | 1.24 | 1.02, 1.51 | 0.032 | 1.08 | 0.88, 1.33 | 0.5 | 1.34 | 0.98, 1.82 | 0.064 | 1.11 | 0.92, 1.35 | 0.3 |
| Age | 1.00 | 1.00, 1.00 | 0.3 | 1.00 | 1.00, 1.00 | 0.3 | 1.00 | 1.00, 1.00 | 0.3 | 1.00 | 1.00, 1.00 | 0.3 | 1.00 | 1.00, 1.00 | 0.3 |
| Sex |  |  |  |  |  |  |  |  |  |  |  |  |  |  |  |
| Female | — | — |  | — | — |  | — | — |  | — | — |  | — | — |  |
| Male | 0.96 | 0.89, 1.03 | 0.3 | 0.96 | 0.89, 1.03 | 0.3 | 0.95 | 0.89, 1.03 | 0.2 | 0.95 | 0.89, 1.03 | 0.2 | 0.96 | 0.89, 1.03 | 0.2 |
| Unknown | 1.14 | 0.74, 1.75 | 0.5 | 1.14 | 0.75, 1.73 | 0.5 | 1.13 | 0.74, 1.73 | 0.6 | 1.13 | 0.74, 1.73 | 0.6 | 1.14 | 0.74, 1.76 | 0.6 |
| missing | 2.13 | 1.45, 3.12 | <0.001 | 2.12 | 1.45, 3.11 | <0.001 | 2.11 | 1.43, 3.12 | <0.001 | 2.10 | 1.43, 3.10 | <0.001 | 2.08 | 1.41, 3.05 | <0.001 |
| Enrollment site |  |  |  |  |  |  |  |  |  |  |  |  |  |  |  |
| Arizona (AZ) | — | — |  | — | — |  | — | — |  | — | — |  | — | — |  |
| Colorado (CO) | 1.27 | 0.97, 1.67 | 0.082 | 1.25 | 0.95, 1.63 | 0.11 | 1.24 | 0.94, 1.64 | 0.12 | 1.24 | 0.94, 1.62 | 0.12 | 1.26 | 0.95, 1.65 | 0.10 |
| Columbia (NY) | 1.14 | 0.90, 1.43 | 0.3 | 1.14 | 0.90, 1.43 | 0.3 | 1.19 | 0.94, 1.50 | 0.2 | 1.11 | 0.88, 1.41 | 0.4 | 1.16 | 0.92, 1.48 | 0.2 |
| Marshfield (WI) | 1.09 | 0.82, 1.44 | 0.6 | 1.09 | 0.82, 1.44 | 0.5 | 1.08 | 0.81, 1.43 | 0.6 | 1.18 | 0.87, 1.61 | 0.3 | 1.05 | 0.80, 1.39 | 0.7 |
| Nashville (TN) | 1.28 | 1.03, 1.59 | 0.024 | 1.25 | 1.02, 1.54 | 0.033 | 1.24 | 1.00, 1.54 | 0.051 | 1.28 | 1.03, 1.60 | 0.024 | 1.24 | 1.01, 1.54 | 0.043 |
| North Carolina (NC) | 1.38 | 1.09, 1.75 | 0.008 | 1.36 | 1.07, 1.71 | 0.011 | 1.36 | 1.07, 1.73 | 0.012 | 1.35 | 1.07, 1.70 | 0.011 | 1.35 | 1.07, 1.72 | 0.012 |
| Stanford (CA) | 1.20 | 0.94, 1.53 | 0.15 | 1.22 | 0.95, 1.56 | 0.12 | 1.18 | 0.92, 1.51 | 0.2 | 1.13 | 0.89, 1.44 | 0.3 | 1.16 | 0.91, 1.48 | 0.2 |
| SARS-CoV-2 Vaccine receipt |  |  |  |  |  |  |  |  |  |  |  |  |  |  |  |
| 0-1 dose | — | — |  | — | — |  | — | — |  | — | — |  | — | — |  |
| 2 or more doses | 0.96 | 0.87, 1.07 | 0.5 | 0.96 | 0.87, 1.07 | 0.5 | 0.96 | 0.86, 1.06 | 0.4 | 0.95 | 0.86, 1.06 | 0.4 | 0.96 | 0.86, 1.06 | 0.4 |
| Race/ethnicity |  |  |  |  |  |  |  |  |  |  |  |  |  |  |  |
| White, Non-Hispanic | — | — |  | — | — |  | — | — |  | — | — |  | — | — |  |
| Asian, Non-Hispanic | 0.95 | 0.70, 1.28 | 0.7 | 0.95 | 0.70, 1.28 | 0.7 | 0.95 | 0.70, 1.29 | 0.7 | 0.93 | 0.69, 1.27 | 0.7 | 0.95 | 0.70, 1.29 | 0.7 |
| Black, Non-Hispanic | 0.96 | 0.80, 1.15 | 0.7 | 0.96 | 0.80, 1.15 | 0.7 | 1.00 | 0.84, 1.19 | >0.9 | 0.95 | 0.78, 1.14 | 0.6 | 1.00 | 0.83, 1.19 | >0.9 |
| Hispanic/Latino | 1.04 | 0.90, 1.20 | 0.6 | 1.04 | 0.90, 1.19 | 0.6 | 1.08 | 0.94, 1.23 | 0.3 | 1.04 | 0.90, 1.20 | 0.6 | 1.07 | 0.93, 1.22 | 0.3 |
| Multiple race, Non-Hispanic | 0.96 | 0.74, 1.24 | 0.7 | 0.95 | 0.74, 1.23 | 0.7 | 0.96 | 0.74, 1.25 | 0.8 | 0.96 | 0.74, 1.24 | 0.8 | 0.96 | 0.74, 1.25 | 0.8 |
| NH/OPI, Non-Hispanic | 1.52 | 1.21, 1.92 | <0.001 | 1.54 | 1.25, 1.89 | <0.001 | 1.54 | 1.25, 1.89 | <0.001 | 1.59 | 1.29, 1.96 | <0.001 | 1.51 | 1.19, 1.92 | <0.001 |
| Unknown/Refused | 1.20 | 0.96, 1.51 | 0.11 | 1.20 | 0.96, 1.50 | 0.12 | 1.24 | 0.99, 1.56 | 0.060 | 1.20 | 0.96, 1.51 | 0.11 | 1.24 | 0.99, 1.55 | 0.066 |
| missing | 0.85 | 0.62, 1.16 | 0.3 | 0.84 | 0.61, 1.16 | 0.3 | 0.86 | 0.62, 1.18 | 0.3 | 0.85 | 0.61, 1.17 | 0.3 | 0.86 | 0.62, 1.18 | 0.3 |

1. Adjusted models included age, sex, study site, vaccine receipt, and clustering by census tract. SARS-CoV-2 vaccine receipt defined as unvaccinated if received 1 or fewer COVID-19 vaccine doses and vaccinated if received 2 or more COVID-19 vaccine doses. Influenza vaccine receipt defined as unvaccinated if did not receive annual Influenza vaccine and vaccinated if participant did receive the seasonal Influenza vaccine.

Supplemental Table 2: Adjusted Incident Rate Ratios (aIRRs)1 of influenza among exposed household contacts by National Social Vulnerability Index overall and by domain percentiles, adjusted for age, study site, and race/ethnicity, cluster adjusted within census tract in a case ascertained household transmission study, United States, September 2021-May 2023,

|  | **Overall** | | | **Theme 1: Socioeconomic Status** | | | **Theme 2: Household Characteristics** | | | **Theme 3: Racial/ethnic minorities** | | | **Theme 4: Household type-transportation-crowding** | | |
| --- | --- | --- | --- | --- | --- | --- | --- | --- | --- | --- | --- | --- | --- | --- | --- |
| **Characteristic** | **IRR***1* | **95% CI***1* | **p-value** | **IRR***1* | **95% CI***1* | **p-value** | **IRR***1* | **95% CI***1* | **p-value** | **IRR***1* | **95% CI***1* | **p-value** | **IRR***1* | **95% CI***1* | **p-value** |
| SVI | 1.45 | 0.88, 2.39 | 0.14 | 1.26 | 0.74, 2.12 | 0.4 | 1.52 | 0.98, 2.35 | 0.063 | 1.90 | 0.95, 3.80 | 0.069 | 1.31 | 0.81, 2.12 | 0.3 |
| Age | 1.00 | 0.99, 1.00 | 0.071 | 1.00 | 0.99, 1.00 | 0.060 | 1.00 | 0.99, 1.00 | 0.062 | 1.00 | 0.99, 1.00 | 0.079 | 1.00 | 0.99, 1.00 | 0.063 |
| Sex |  |  |  |  |  |  |  |  |  |  |  |  |  |  |  |
| Female | — | — |  | — | — |  | — | — |  | — | — |  | — | — |  |
| Male | 1.04 | 0.88, 1.22 | 0.7 | 1.03 | 0.87, 1.20 | 0.8 | 1.04 | 0.88, 1.22 | 0.6 | 1.03 | 0.88, 1.21 | 0.7 | 1.03 | 0.87, 1.21 | 0.7 |
| Enrollment site |  |  |  |  |  |  |  |  |  |  |  |  |  |  |  |
| Arizona (AZ) | — | — |  | — | — |  | — | — |  | — | — |  | — | — |  |
| Colorado (CO) | 1.40 | 1.17, 1.67 | <0.001 | 1.40 | 1.10, 1.78 | 0.006 | 1.51 | 1.14, 2.00 | 0.004 | 1.17 | 0.98, 1.39 | 0.081 | 1.29 | 1.10, 1.52 | 0.002 |
| Columbia (NY) | 0.46 | 0.31, 0.67 | <0.001 | 0.48 | 0.33, 0.72 | <0.001 | 0.49 | 0.33, 0.73 | <0.001 | 0.39 | 0.25, 0.61 | <0.001 | 0.46 | 0.31, 0.68 | <0.001 |
| Marshfield (WI) | 0.23 | 0.04, 1.24 | 0.088 | 0.23 | 0.04, 1.24 | 0.087 | 0.24 | 0.04, 1.35 | 0.11 | 0.26 | 0.05, 1.39 | 0.12 | 0.21 | 0.04, 1.14 | 0.071 |
| Nashville (TN) | 0.66 | 0.52, 0.84 | <0.001 | 0.64 | 0.49, 0.83 | <0.001 | 0.67 | 0.49, 0.91 | 0.010 | 0.63 | 0.50, 0.78 | <0.001 | 0.64 | 0.50, 0.81 | <0.001 |
| North Carolina (NC) | 0.69 | 0.43, 1.09 | 0.11 | 0.67 | 0.42, 1.09 | 0.10 | 0.68 | 0.41, 1.12 | 0.13 | 0.62 | 0.40, 0.98 | 0.039 | 0.65 | 0.41, 1.04 | 0.072 |
| Stanford (CA) | 0.85 | 0.53, 1.35 | 0.5 | 0.88 | 0.55, 1.42 | 0.6 | 0.93 | 0.56, 1.54 | 0.8 | 0.69 | 0.42, 1.13 | 0.14 | 0.81 | 0.50, 1.31 | 0.4 |
| Influenza Vaccine receipt |  |  |  |  |  |  |  |  |  |  |  |  |  |  |  |
| Unvaccinated for Influenza | — | — |  | — | — |  | — | — |  | — | — |  | — | — |  |
| Vaccinated for Influenza | 0.88 | 0.72, 1.07 | 0.2 | 0.88 | 0.72, 1.07 | 0.2 | 0.86 | 0.71, 1.06 | 0.2 | 0.88 | 0.72, 1.07 | 0.2 | 0.88 | 0.72, 1.07 | 0.2 |
| Race/ethnicity |  |  |  |  |  |  |  |  |  |  |  |  |  |  |  |
| White, Non-Hispanic | — | — |  | — | — |  | — | — |  | — | — |  | — | — |  |
| AI/AN, Non-Hispanic | 1.02 | 0.90, 1.15 | 0.8 | 1.00 | 0.89, 1.13 | >0.9 | 1.01 | 0.90, 1.14 | 0.8 | 1.15 | 0.95, 1.38 | 0.15 | 0.99 | 0.87, 1.11 | 0.8 |
| Asian, Non-Hispanic | 0.81 | 0.26, 2.52 | 0.7 | 0.80 | 0.25, 2.51 | 0.7 | 0.79 | 0.26, 2.37 | 0.7 | 0.76 | 0.27, 2.14 | 0.6 | 0.81 | 0.26, 2.54 | 0.7 |
| Black, Non-Hispanic | 0.97 | 0.63, 1.49 | 0.9 | 1.02 | 0.66, 1.55 | >0.9 | 1.00 | 0.67, 1.51 | >0.9 | 0.96 | 0.63, 1.47 | 0.9 | 1.01 | 0.66, 1.54 | >0.9 |
| Hispanic/Latino | 1.23 | 0.86, 1.76 | 0.3 | 1.27 | 0.90, 1.81 | 0.2 | 1.27 | 0.90, 1.78 | 0.2 | 1.24 | 0.87, 1.78 | 0.2 | 1.29 | 0.91, 1.83 | 0.15 |
| Multiple race, Non-Hispanic | 1.42 | 0.74, 2.70 | 0.3 | 1.44 | 0.74, 2.79 | 0.3 | 1.33 | 0.69, 2.58 | 0.4 | 1.31 | 0.68, 2.50 | 0.4 | 1.51 | 0.77, 2.98 | 0.2 |
| NH/OPI, Non-Hispanic | 1.58 | 1.01, 2.45 | 0.043 | 1.81 | 1.19, 2.76 | 0.006 | 1.59 | 1.08, 2.33 | 0.018 | 1.75 | 1.30, 2.36 | <0.001 | 1.74 | 1.15, 2.62 | 0.008 |
| Unknown/Refused | 0.94 | 0.40, 2.18 | 0.9 | 0.97 | 0.43, 2.20 | >0.9 | 0.95 | 0.41, 2.21 | >0.9 | 0.96 | 0.41, 2.22 | >0.9 | 0.98 | 0.43, 2.26 | >0.9 |
| missing | 0.00 | 0.00, 0.00 | <0.001 | 0.00 | 0.00, 0.00 | <0.001 | 0.00 | 0.00, 0.00 | <0.001 | 0.00 | 0.00, 0.00 | <0.001 | 0.00 | 0.00, 0.00 | <0.001 |

**Supplemental Table 3: Mediation analysis using the Baron-Kenny method for SARS-CoV-2 households**

| SARS-CoV-2 |  |  |  |
| --- | --- | --- | --- |
| Regressing Household infection on SVI (Y on X) |  |  |  |
| **Characteristic** | **IRR***1* | **95% CI***1* | **p-value** |
| **SVI: overall** | **1.20** | **1.04, 1.38** | **0.01** |
| **SVI: Socioeconomic status** | **1.24** | **1.08, 1.43** | **0.00** |
| SVI: Household characteristics | 1.11 | 0.95, 1.30 | 0.20 |
| **SVI: Racial/ethnic minorities** | **1.25** | **1.05, 1.48** | **0.01** |
| SVI: Household type, transportation, crowding | 1.12 | 0.97, 1.30 | 0.13 |
| *1* IRR = Incidence Rate Ratio, CI = Confidence Interval | | | |
| Regressing vaccination receipt (yes/no) on SVI (X on M) |  |  |  |
| **Characteristic** | **IRR***1* | **95% CI***1* | **p-value** |
| **SVI: overall** | **0.88** | **0.83, 0.92** | **<0.001** |
| **SVI: Socioeconomic status** | **0.87** | **0.83, 0.92** | **<0.001** |
| **SVI: Household characteristics** | **0.87** | **0.83, 0.92** | **<0.001** |
| **SVI: Racial/ethnic minorities** | **0.93** | **0.88, 0.99** | **0.03** |
| **SVI: Household type, transportation, crowding** | **0.89** | **0.85, 0.93** | **<0.001** |
| *1* IRR = Incidence Rate Ratio, CI = Confidence Interval | | | |
| Regressing household infection on SVI + vaccine receipt (Y on X+M) |  |  |  |
| **Characteristic** | **IRR***1* | **95% CI***1* | **p-value** |
| **SVI: overall** | **1.18** | **1.02, 1.36** | **0.02** |
| Vaccine receipt |  |  |  |
| No | Reference |  |  |
| Yes | 0.93 | 0.84, 1.02 | 0.12 |
| **SVI: Socioeconomic status** | **1.22** | **1.06, 1.41** | **0.01** |
| Vaccine receipt |  |  |  |
| No | Reference |  |  |
| Yes | 0.93 | 0.85, 1.03 | 0.20 |
| SVI: Household characteristics | 1.09 | 0.93, 1.27 | 0.30 |
| Vaccine receipt |  |  |  |
| No | Reference |  |  |
| Yes | 0.91 | 0.83, 1.01 | 0.07 |
| **SVI: Racial/ethnic minorities** | **1.23** | **1.04, 1.46** | **0.02** |
| Vaccine receipt |  |  |  |
| No | Reference |  |  |
| Yes | 0.92 | 0.83, 1.01 | 0.07 |
| SVI: Household type, transportation, crowding | 1.1 | 0.95, 1.28 | 0.20 |
| Vaccine receipt |  |  |  |
| No | Reference |  |  |
| Yes | 0.92 | 0.83, 1.01 | 0.07 |
| *1* IRR = Incidence Rate Ratio, CI = Confidence Interval | | | |

**Supplemental Table 4: Mediation analysis using the Baron-Kenny method for Influenza households**

| Regressing Household infection on SVI (Y on X) |  |  |  |
| --- | --- | --- | --- |
| **Characteristic** | **IRR***1* | **95% CI***1* | **p-value** |
| SVI: Overall | 1.17 | 0.88, 1.56 | 0.30 |
| SVI: Socioeconomic status | 1.14 | 0.84, 1.54 | 0.40 |
| SVI: Household Characteristics | 1.27 | 0.92, 1.77 | 0.15 |
| SVI: Racial/ethnic minorities | 1.25 | 0.87, 1.79 | 0.20 |
| SVI: Household type, transportation, crowding | 1.15 | 0.85, 1.56 | 0.40 |
| *1* IRR = Incidence Rate Ratio, CI = Confidence Interval | | | |
| Regressing Influenza vaccination receipt (yes/no) on SVI (X on M) |  |  |  |
| **Characteristic** | **IRR***1* | **95% CI***1* | **p-value** |
| **SVI: Overall** | **0.90** | **0.81, 1.00** | **0.05** |
| **SVI: Socioeconomic status** | **0.89** | **0.79, 1.00** | **0.04** |
| SVI: Household Characteristics | 0.97 | 0.86, 1.10 | 0.60 |
| **SVI: Racial/ethnic minorities** | **0.86** | **0.76, 0.98** | **0.03** |
| **SVI: Household type, transportation, crowding** | **0.88** | **0.78, 0.98** | **0.02** |
| *1* IRR = Incidence Rate Ratio, CI = Confidence Interval | | | |
| Regressing household infection on SVI + Influenza vaccine receipt (Y on X+M) |  |  |  |
| **Characteristic** | **IRR***1* | **95% CI***1* | **p-value** |
| SVI: Overall | 1.14 | 0.85, 1.53 | 0.40 |
| Vaccine receipt | Reference |  |  |
| No |  |  |  |
| Yes | 0.87 | 0.70, 1.06 | 0.20 |
| SVI: Socioeconomic status | 1.11 | 0.82, 1.51 | 0.50 |
| Vaccine receipt |  |  |  |
| No | Reference |  |  |
| Yes | 0.86 | 0.70, 1.06 | 0.20 |
| SVI: Household Characteristics | 1.27 | 0.91, 1.76 | 0.20 |
| Vaccine receipt |  |  |  |
| No | Reference |  |  |
| Yes | 0.86 | 0.70, 1.05 | 0.15 |
| SVI: Racial/ethnic minorities | 1.21 | 0.84, 1.75 | 0.30 |
| Vaccine receipt |  |  |  |
| No | Reference |  |  |
| Yes | 0.87 | 0.71, 1.07 | 0.20 |
| SVI: Household type, transportation, crowding | 1.12 | 0.82, 1.52 | 0.50 |
| Vaccine receipt |  |  |  |
| No | Reference |  |  |
| Yes | 0.86 | 0.70, 1.06 | 0.20 |
| *1* IRR = Incidence Rate Ratio, CI = Confidence Interval | | | |

## Effect modification by pathogen analysis

Supplemental Table 5:Effect modification analysis of SVI domain percentile by pathogen among SARS-CoV-2 and influenza household contacts in a case ascertained household transmission study using an interaction term: United Staates, September 2021-May 20231

|  | Estimate | Exponentiated | Standard error | Wald | Pr(>|Wald|) |
| --- | --- | --- | --- | --- | --- |
| Model 1 |  |  |  |  |  |
| **(Intercept)** | **0.33** | **1.39** | **0.02** | **275.24** | **<0.001** |
| **SVI: Overall** | **-0.09** | **0.91** | **0.04** | **6.44** | **0.01** |
| SARS-CoV-2 | Reference |  |  |  |  |
| **Influenza** | **0.09** | **1.09** | **0.04** | **4.43** | **0.04** |
| SVI: Overall*Influenza | 0.04 | 1.04 | 0.06 | 0.33 | 0.57 |
| Model 2 |  |  |  |  |  |
| **(Intercept)** | **0.34** | **1.40** | **0.02** | **293.48** | **<0.001** |
| **SVI: Socioeconomic** | **-0.11** | **0.90** | **0.04** | **8.90** | **<0.001** |
| SARS-CoV-2 | Reference |  |  |  |  |
| Influenza | 0.07 | 1.08 | 0.04 | 3.18 | 0.07 |
| SVI: Socioeconomic*Influenza | 0.06 | 1.06 | 0.07 | 0.90 | 0.34 |
| Model 3 |  |  |  |  |  |
| **(Intercept)** | **0.31** | **1.37** | **0.02** | **212.41** | **<0.001** |
| SVI: Household Characteristics | -0.05 | 0.95 | 0.04 | 1.72 | 0.19 |
| SARS-CoV-2 | Reference |  |  |  |  |
| **Influenza** | **0.12** | **1.13** | **0.04** | **7.65** | **0.01** |
| SVI: Household Characteristics*Influenza | -0.04 | 0.97 | 0.07 | 0.24 | 0.63 |
| Model 4 |  |  |  |  |  |
| **(Intercept)** | **0.35** | **1.42** | **0.03** | **188.62** | **<0.001** |
| **SVI: Racial/Ethnic Minorities** | **-0.11** | **0.90** | **0.04** | **6.71** | **0.01** |
| SARS-CoV-2 | Reference |  |  |  |  |
| Influenza | 0.09 | 1.09 | 0.05 | 2.93 | 0.09 |
| SVI: Racial/Ethnic Minorities*Influenza | 0.03 | 1.03 | 0.08 | 0.17 | 0.68 |
| Model 5 |  |  |  |  |  |
| **(Intercept)** | **0.32** | **1.38** | **0.02** | **208.09** | **<0.001** |
| SVI: Household type, transportation, crowding | -0.06 | 0.95 | 0.04 | 2.32 | 0.13 |
| SARS-CoV-2 | Reference |  |  |  |  |
| **Influenza** | **0.09** | **1.10** | **0.04** | **4.52** | **0.03** |
| SVI: Household type, transportation, crowding*Influenza | 0.01 | 1.01 | 0.07 | 0.01 | 0.91 |

Footnote: 1 We combined both cohorts and created a binary variable if a household contact was infected with either Influenza or SARS-CoV-2. We then created a binary variable by pathogen to evaluate differences between cohorts and to see if the household infection regressed on SVI differed by pathogen using an interaction term with SARS-CoV-2 as the reference group. We used these regressions to calculate Wald scores to evaluate statistical significance. We did not find any statistical significance with the interaction terms in the model.

## Supplemental Figures

### Box and whisker plots

**Supplemental Figure 1:** Box and Whisker plots of SVI domain percentile at the census tract level by vaccine receipt1 among SARS-CoV-2 household contacts.


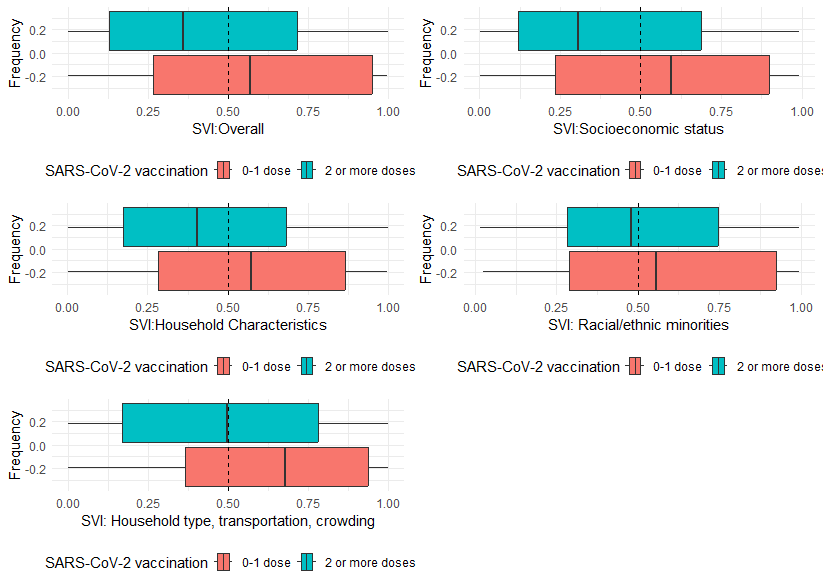
 Footnote:

1 SARS-CoV-2 vaccine receipt defined as unvaccinated if received 1 or fewer COVID-19 vaccine doses and vaccinated if received 2 or more COVID-19 vaccine doses. **Supplemental**

**Figure 2:** Box and Whisker plots of SVI domain percentile at the census tract level by vaccine receipt1 among the Influenza household contacts.
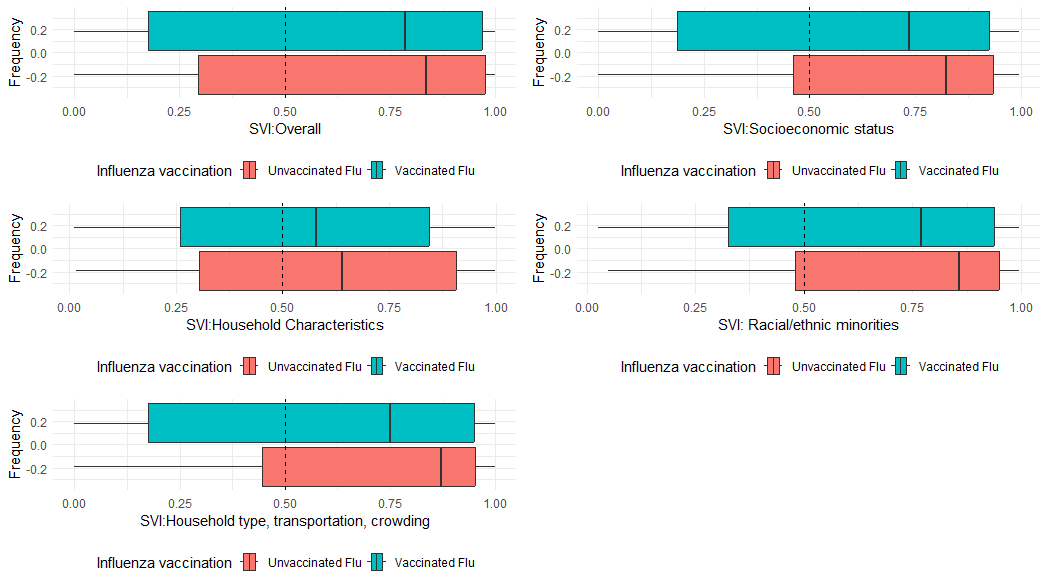


Footnote:

1 Influenza vaccine receipt defined as unvaccinated if did not receive annual Influenza vaccine and vaccinated if participant did receive the seasonal Influenza vaccine.

### Forest plots

Supplemental Figure 3: **Forest plots of** Crude (cIRR) and adjusted Incident Rate Ratios (aIRRs)1 of SARS-CoV-2 or Influenza among exposed household contacts by National or State Social Vulnerability Index overall and by domain percentiles, adjusted for age, sex, study site, race/ethnicity, and vaccine receipt. cluster adjusted within census tract in a case ascertained household transmission study, United States, September 2021-May 2023


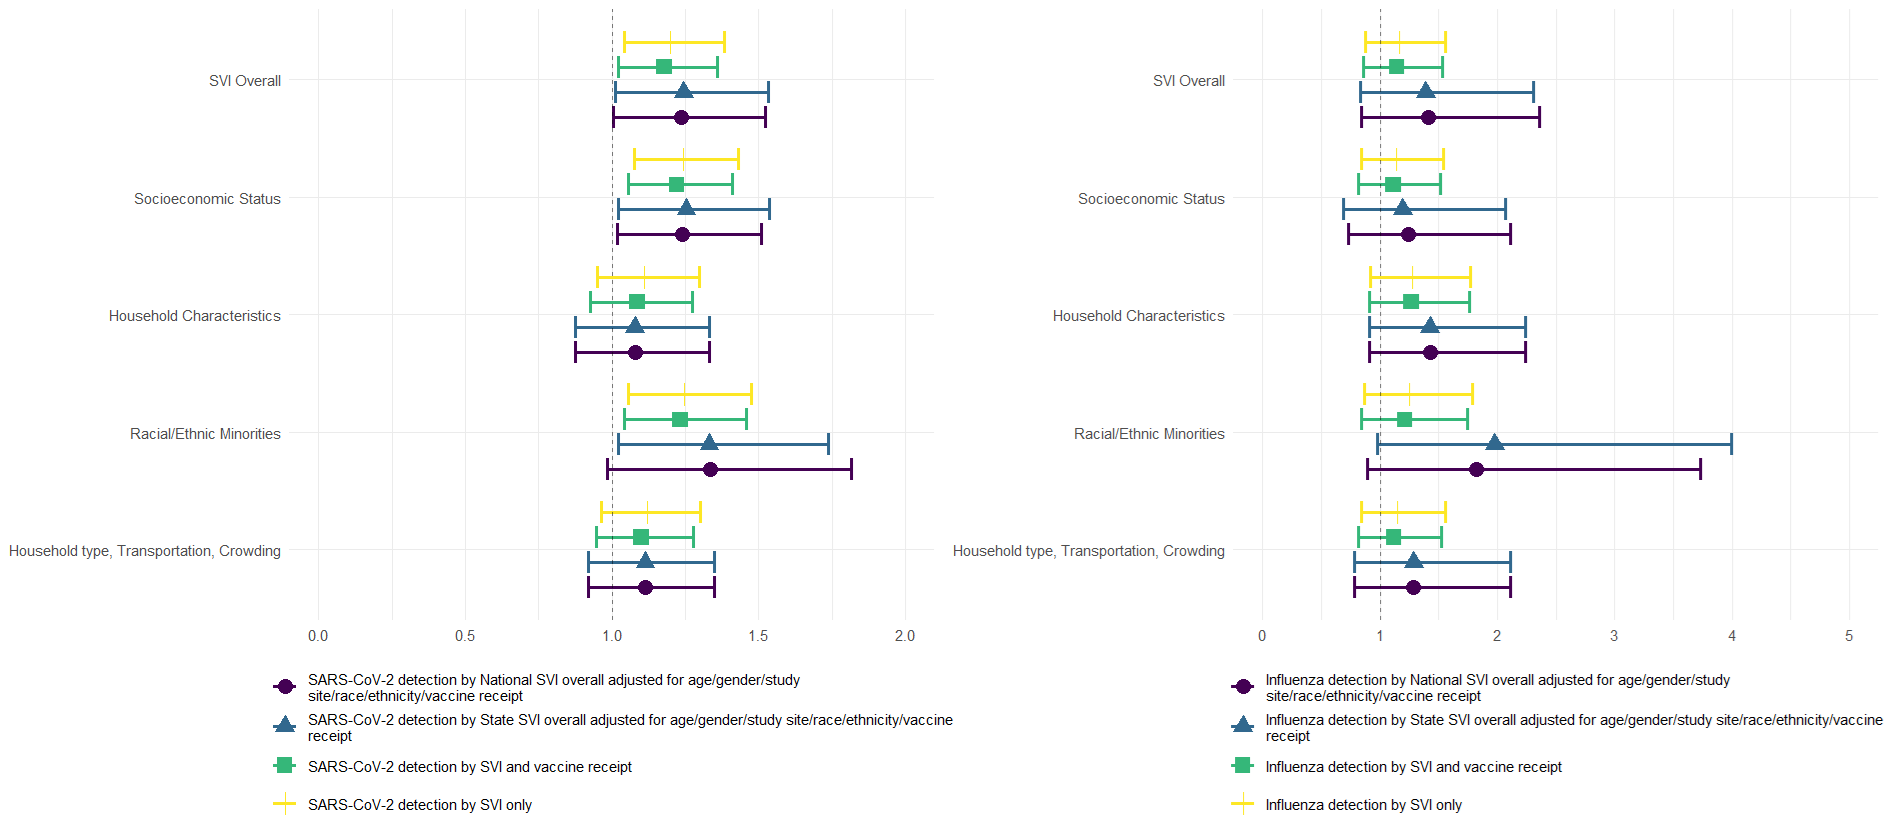


1 Adjusted models included age, sex, study site, vaccine receipt, and clustering by census tract. SARS-CoV-2 vaccine receipt defined as unvaccinated if received 1 or fewer COVID-19 vaccine doses and vaccinated if received 2 or more COVID-19 vaccine doses. Influenza vaccine receipt defined as unvaccinated if did not receive annual Influenza vaccine and vaccinated if participant did receive the seasonal Influenza vaccine.
